# Supplementary material for: IgE Sensitization Profiles Differ between Adult Patients with Severe and Moderate Atopic Dermatitis
Source: PubMed Central journal article supplement (PMC4881900; doi:10.1371/journal.pone.0156077), 2016-05-26
Supplement: pone.0156077.s003.pdf [file pone.0156077.s003.pdf]

**S1 Table. Recombinant *M. sympodialis* allergens used in this study**

| <b>Allergen</b> | <b>Accession number<br/>[reference]</b> | <b>Function</b>                             | <b>Prediction for<br/>Secretion [20]</b> | <b>Cross-reactivity to<br/>human protein</b> |
|-----------------|-----------------------------------------|---------------------------------------------|------------------------------------------|----------------------------------------------|
| Mala s 1        | X96486 [16]                             | unknown                                     | yes                                      | no                                           |
| Mala s 5        | AJ011955 [17]                           | peroxisomal protein                         | no                                       | No                                           |
| Mala s 6        | AJ011956 [17]                           | cyclophilin                                 | no                                       | Yes                                          |
| Mala s 7        | AJ011957 [18]                           | unknown                                     | yes                                      | No                                           |
| Mala s 8        | AJ011958 [18]                           | unknown                                     | yes                                      | No                                           |
| Mala s 9        | AJ011959 [18]                           | unknown                                     | no                                       | No                                           |
| Mala s 10       | AJ428052 [19]                           | heat shock protein                          | no                                       | Yes                                          |
| Mala s 11       | AJ548421 [19]                           | manganese superoxide<br>dismutase           | no                                       | Yes                                          |
| Mala s 12       | AJ871960 [20]                           | glucose-methanol-<br>choline oxidoreductase | yes                                      | Yes                                          |
| Mala s 13       | AJ937746 [21]                           | thioredoxin                                 | no                                       | Yes                                          |
