# Supplementary material for: IgE Sensitization Profiles Differ between Adult Patients with Severe and Moderate Atopic Dermatitis
Source: PubMed Central journal article supplement (PMC4881900; doi:10.1371/journal.pone.0156077), 2016-05-26
Supplement: pone.0156077.s005.pdf [file pone.0156077.s005.pdf]

**S3 Table. Frequencies of IgE reactivity to purified allergens in AD patients and controls detected by allergen chip technology**

| No. | Allergen      | All AD<br>n=179 | Severe AD<br>n=53 | Moderate AD<br>n=126 | SE patients<br>n=43 | Healthy controls<br>n=12 | Allergen family, Function, CCD              |
|-----|---------------|-----------------|-------------------|----------------------|---------------------|--------------------------|---------------------------------------------|
| 1   | rFel d 1      | 52%             | 68%               | 45%                  | 0%                  | 0%                       | Fel d 1 family, Uteroglobin                 |
| 2   | rBet v 1      | 52%             | 62%               | 48%                  | 14%                 | 0%                       | PR-10                                       |
| 3   | rPhl p 1      | 44%             | 45%               | 44%                  | 14%                 | 0%                       | Grass group 1, $\beta$ -Expansin            |
| 4   | rMal d 1      | 42%             | 58%               | 35%                  | 9%                  | 0%                       | PR-10                                       |
| 5   | nCyn d 1      | 36%             | 40%               | 34%                  | 12%                 | 0%                       | Grass group 1, $\beta$ -Expansin            |
| 6   | rCor a 1.0401 | 34%             | 47%               | 28%                  | 9%                  | 0%                       | PR-10                                       |
| 7   | nPhl p 4      | 29%             | 42%               | 23%                  | 9%                  | 0%                       | Grass group 4, Berberine bridge enzyme, CCD |
| 8   | rAln g 1      | 26%             | 38%               | 21%                  | 5%                  | 0%                       | PR-10                                       |
| 9   | rPhl p 5b     | 26%             | 23%               | 28%                  | 12%                 | 0%                       | Grass group 5                               |
| 10  | rAra h 8      | 25%             | 32%               | 22%                  | 5%                  | 0%                       | PR-10                                       |
| 11  | rCan f 1      | 24%             | 30%               | 21%                  | 2%                  | 0%                       | Lipocalin                                   |
| 12  | rFel d 4      | 24%             | 28%               | 22%                  | 0%                  | 0%                       | Lipocalin                                   |
| 13  | rEqu c 1      | 23%             | 26%               | 22%                  | 0%                  | 0%                       | Lipocalin                                   |
| 14  | rCan f 5      | 22%             | 26%               | 21%                  | 2%                  | 0%                       | Arginine Esterase                           |
| 15  | nFel d 2      | 21%             | 34%               | 16%                  | 0%                  | 0%                       | Serum Albumin                               |
| 16  | rPhl p 6      | 20%             | 23%               | 18%                  | 12%                 | 0%                       | Grass group 5/6                             |
| 17  | nArt v 1      | 20%             | 23%               | 18%                  | 2%                  | 0%                       | Defensin-like protein                       |
| 18  | rDer p 2      | 19%             | 25%               | 17%                  | 5%                  | 0%                       | Group 2 mite allergen, NPC2 family          |
| 19  | rPru p 1      | 18%             | 28%               | 14%                  | 5%                  | 0%                       | PR-10                                       |
| 20  | rDer f 2      | 17%             | 23%               | 15%                  | 2%                  | 0%                       | Group 2 mite allergen, NPC2 family          |
| 21  | rPhl p 2      | 17%             | 11%               | 20%                  | 7%                  | 0%                       | Grass group 2/3                             |
| 22  | rGly m 4      | 16%             | 25%               | 13%                  | 5%                  | 0%                       | PR-10                                       |
| 23  | rAsp f 6      | 16%             | 19%               | 14%                  | 0%                  | 0%                       | Mn superoxide Dismutase                     |

|    |             |     |     |     |    |    |                                          |
|----|-------------|-----|-----|-----|----|----|------------------------------------------|
| 24 | rPar j 2    | 15% | 30% | 8%  | 0% | 0% | nsLTP, type 2                            |
| 25 | rCan f 6    | 15% | 19% | 13% | 0% | 0% | Lipocalin                                |
| 26 | nDer p 1    | 14% | 21% | 11% | 2% | 0% | Group 1 mite allergen, Cysteine protease |
| 27 | rCan f 2    | 14% | 17% | 13% | 0% | 0% | Lipocalin                                |
| 28 | nDer f 1    | 13% | 19% | 11% | 2% | 0% | Group 1 mite allergen, Cysteine protease |
| 29 | nMus m 1    | 13% | 19% | 11% | 0% | 0% | Lipocalin                                |
| 30 | rHev b 8    | 11% | 21% | 7%  | 7% | 0% | Profilin                                 |
| 31 | rDer p 4    | 10% | 19% | 6%  | 2% | 0% | Group 4 mite allergen, $\alpha$ -Amylase |
| 32 | rDer p 23   | 10% | 13% | 9%  | 2% | 0% | Chitin-binding domain                    |
| 33 | rHev b 6.01 | 10% | 13% | 9%  | 0% | 0% | Hevein                                   |
| 34 | rOle e 9    | 9%  | 15% | 7%  | 0% | 0% | Glucanase                                |
| 35 | rBet v 4    | 9%  | 13% | 7%  | 2% | 0% | Polcalcin                                |
| 36 | nCup a 1    | 8%  | 13% | 6%  | 2% | 0% | Pectate Lyase, CCD                       |
| 37 | rPru p 3    | 8%  | 11% | 6%  | 0% | 0% | nsLTP, type 1                            |
| 38 | rCan f 4    | 8%  | 11% | 6%  | 0% | 0% | Lipocalin                                |
| 39 | rPhl p 11   | 8%  | 9%  | 7%  | 0% | 0% | Ole e 1-related protein                  |
| 40 | rDer p 10   | 7%  | 15% | 3%  | 0% | 0% | Group 10 mite allergen, Tropomyosin      |
| 41 | nGal d 1    | 7%  | 15% | 3%  | 0% | 0% | Ovomucoid                                |
| 42 | rMer a 1    | 7%  | 11% | 5%  | 5% | 0% | Profilin                                 |
| 43 | nPen m 2    | 7%  | 9%  | 6%  | 0% | 0% | Arginine kinase-like protein             |
| 44 | rPru du 4   | 6%  | 13% | 3%  | 5% | 0% | Profilin                                 |
| 45 | rDer p 5    | 6%  | 11% | 4%  | 2% | 0% | Group 5 mite allergen                    |
| 46 | rPol d 5    | 6%  | 11% | 3%  | 4% | 0% | Insect venom, Antigen 5                  |
| 47 | rHev b 1    | 6%  | 9%  | 4%  | 2% | 0% | Rubber elongation factor                 |
| 48 | nCan f 3    | 6%  | 8%  | 6%  | 0% | 0% | Serum Albumin                            |
| 49 | nJug r 2    | 6%  | 6%  | 6%  | 0% | 0% | Storage protein, 7S globulin, CCD        |
| 50 | rVes v 5    | 6%  | 6%  | 6%  | 2% | 0% | Insect venom, Antigen 5                  |
| 51 | nPla a 2    | 5%  | 8%  | 4%  | 0% | 0% | Polygalacturonase, CCD                   |

|    |                   |    |    |    |    |    |                                       |
|----|-------------------|----|----|----|----|----|---------------------------------------|
| 52 | rDer p 7          | 5% | 8% | 4% | 2% | 0% | Group 7 mite allergen                 |
| 53 | rJug r 1          | 5% | 8% | 4% | 0% | 0% | Storage protein, 2S albumin           |
| 54 | nArt v 3          | 5% | 8% | 4% | 0% | 0% | nsLTP, type 1                         |
| 55 | rDer p 11         | 4% | 8% | 3% | 0% | 0% | Group 11 mite allergen,<br>Paramyosin |
| 56 | rTri a<br>19.0101 | 4% | 8% | 3% | 0% | 0% | Storage protein, Omega 5 gliadin      |
| 57 | rBet v 2          | 4% | 6% | 4% | 2% | 0% | Profilin                              |
| 58 | rCor a 8          | 4% | 6% | 4% | 0% | 0% | nsLTP, type 1                         |
| 59 | nCry j 1          | 4% | 6% | 3% | 0% | 0% | Pectate Lyase, CCD                    |
| 60 | rOle e 1          | 4% | 4% | 4% | 2% | 0% | Ole e 1-related protein               |
| 61 | rAsp f 3          | 4% | 4% | 4% | 0% | 0% | Peroxisomal protein                   |
| 62 | nEqu c 3          | 4% | 2% | 6% | 0% | 0% | Serum Albumin                         |
| 63 | nAct d 1          | 3% | 8% | 2% | 0% | 0% | Cysteine protease                     |
| 64 | nPen m 1          | 3% | 8% | 1% | 0% | 0% | Tropomyosin                           |
| 65 | rDer p 15         | 3% | 6% | 2% | 0% | 0% | Chitin-binding domain                 |
| 66 | rDer p 21         | 3% | 6% | 2% | 0% | 0% | Group 21 mite allergen                |
| 67 | rBla g 2          | 3% | 6% | 2% | 0% | 0% | Aspartic protease                     |
| 68 | rTri a 12         | 3% | 4% | 3% | 2% | 0% | Profilin                              |
| 69 | rDer p 18         | 3% | 4% | 3% | 0% | 0% | Chitin-binding domain                 |
| 70 | rHev b 3          | 3% | 4% | 3% | 0% | 0% | Small rubber particle protein         |
| 71 | rAra h 1          | 3% | 4% | 2% | 0% | 0% | Storage protein, 7S globulin          |
| 72 | rAra h 9          | 3% | 4% | 2% | 0% | 0% | nsLTP, type 1                         |
| 73 | rGad c 1          | 3% | 4% | 2% | 0% | 0% | Parvalbumin                           |
| 74 | rApi m 1          | 3% | 4% | 2% | 2% | 0% | Insect venom, Phospholipase A2        |
| 75 | rPru du 3         | 2% | 6% | 1% | 0% | 0% | nsLTP, type 1                         |
| 76 | rAna o 3          | 2% | 4% | 1% | 0% | 0% | Storage protein, 2S albumin           |
| 77 | rBer e 1          | 2% | 4% | 1% | 0% | 0% | Storage protein, 2S albumin           |
| 78 | rDer p 14         | 2% | 2% | 2% | 0% | 0% | Vitellogenin, Apolipoporphins         |
| 79 | rLep d 2          | 2% | 2% | 2% | 0% | 0% | Group 2 mite allergen, NPC2<br>family |

|     |                 |    |    |    |    |    |                                                     |
|-----|-----------------|----|----|----|----|----|-----------------------------------------------------|
| 80  | rBlo t 5        | 2% | 2% | 2% | 0% | 0% | Group 5 mite allergen                               |
| 81  | nGly m 5        | 2% | 2% | 2% | 0% | 0% | Storage protein, 11S globulin                       |
| 82  | nGly m 6        | 2% | 2% | 2% | 0% | 0% | Storage protein, 11S globulin                       |
| 83  | rAra h 2        | 2% | 2% | 2% | 0% | 0% | Storage protein, 2S albumin                         |
| 84  | rAra h 3        | 2% | 2% | 2% | 0% | 0% | Storage protein, 11S globulin                       |
| 85  | nBos d 5        | 2% | 2% | 2% | 0% | 0% | Lipocalin, $\beta$ -Lactoglobulin                   |
| 86  | nBos d 8        | 2% | 2% | 2% | 0% | 0% | Caseins ( $\alpha$ -, $\beta$ -, $\kappa$ -caseins) |
| 87  | rBos d 12       | 2% | 2% | 2% | 0% | 0% | Caseins ( $\kappa$ -casein)                         |
| 88  | nGal d 3        | 2% | 2% | 2% | 0% | 0% | Ovotransferrin, Conalbumin                          |
| 89  | rPhl p 12       | 2% | 2% | 2% | 2% | 0% | Profilin                                            |
| 90  | rJug r 3        | 2% | 0% | 3% | 0% | 0% | nsLTP, type 1                                       |
| 91  | rAlt a 1        | 2% | 0% | 3% | 0% | 0% | Acidic glycoprotein                                 |
| 92  | rPhl p 7        | 2% | 0% | 3% | 0% | 0% | Calcium-binding proteins, Polcalcin                 |
| 93  | nBla g 7        | 1% | 2% | 1% | 0% | 0% | Tropomyosin                                         |
| 94  | rAni s 3        | 1% | 2% | 1% | 0% | 0% | Tropomyosin                                         |
| 95  | nOle e 7        | 1% | 4% | 0% | 0% | 0% | nsLTP, type 1                                       |
| 96  | nSal k 1        | 1% | 4% | 0% | 0% | 0% | Pectin methylesterase                               |
| 97  | nSes i 1        | 1% | 2% | 1% | 0% | 0% | Storage protein, 2S albumin                         |
| 98  | rPru du<br>6.01 | 1% | 2% | 1% | 0% | 0% | Storage protein, 11S globulin                       |
| 99  | rAna o 2        | 1% | 2% | 1% | 0% | 0% | Storage protein, 11S globulin                       |
| 100 | nGal d 2        | 1% | 2% | 1% | 0% | 0% | Ovalbumin                                           |
| 101 | rPla a 3        | 1% | 2% | 1% | 0% | 0% | nsLTP, type 1                                       |
| 102 | nAct d 2        | 1% | 2% | 1% | 0% | 0% | Thaumatococcus-like protein                         |
| 103 | nPen m 4        | 1% | 2% | 1% | 0% | 0% | Calcium-binding protein                             |
| 104 | rTri a 14       | 1% | 2% | 0% | 0% | 0% | nsLTP, type 1                                       |
| 105 | nAct d 5        | 1% | 2% | 0% | 0% | 0% | Kiwelling                                           |
| 106 | rPla l 1        | 1% | 2% | 0% | 0% | 0% | Ole e 1-related protein                             |
| 107 | rBla g 1        | 1% | 2% | 0% | 0% | 0% | Cockroach group 1                                   |
| 108 | rPis v 3        | 1% | 2% | 0% | 0% | 0% | Storage protein, 7S globulin                        |
| 109 | rHev b 5        | 1% | 2% | 0% | 2% | 0% | Acidic protein                                      |

|     |           |    |    |    |    |    |                                  |
|-----|-----------|----|----|----|----|----|----------------------------------|
| 110 | nBos d 4  | 1% | 0% | 2% | 0% | 0% | $\alpha$ -Lactalbumin            |
| 111 | rBos d 9  | 1% | 0% | 2% | 0% | 0% | Caseins ( $\alpha$ S1-casein)    |
| 112 | rBos d 10 | 1% | 0% | 2% | 0% | 0% | Caseins ( $\alpha$ S2-casein)    |
| 113 | rBos d 11 | 1% | 0% | 2% | 0% | 0% | Caseins ( $\beta$ -casein)       |
| 114 | nAra h 6  | 1% | 0% | 2% | 0% | 0% | Storage protein, 2S albumin      |
| 115 | nCor a 9  | 1% | 0% | 2% | 0% | 0% | Storage protein, 11S globulin    |
| 116 | nBos d 6  | 1% | 0% | 1% | 0% | 0% | Serum Albumin                    |
| 117 | nAmb a 1  | 1% | 0% | 1% | 0% | 0% | Pectate Lyase                    |
| 118 | rAna o 1  | 1% | 0% | 1% | 0% | 0% | Storage protein, 7S globulin     |
| 119 | rAsp f 1  | 1% | 0% | 1% | 0% | 0% | Mitogellin Family (Ribonuclease) |
| 120 | rBla g 5  | 1% | 0% | 1% | 0% | 0% | Glutathione S-transferase        |

a) MeDALL allergen chip, reference range  $\geq 0.3$  ISU

AD=atopic dermatitis, CCD=cross-reactive carbohydrate determinates, r=recombinant, n=natural, SE=seborrhoeic eczema
